# Supplementary material for: Thioacetamide-ligand-mediated synthesis of CsPbBr3–CsPbBr3 homostructured nanocrystals with enhanced stability
Source: Royal Society of Chemistry journal article supplement (doi:10.1039/d1tc02118d), 2021-01-01
Supplement: d1tc02118d1.pdf [file d1tc02118d1.pdf]

## Supporting Information

### Thioacetamide-ligand-mediated synthesis of CsPbBr<sub>3</sub>-CsPbBr<sub>3</sub> homostructured nanocrystals with enhanced stability

Haiyang He<sup>a,1</sup>, Shiliang Mei<sup>b,1</sup>, Zhihao Chen<sup>c,1</sup>, Siyu Liu<sup>c</sup>, Zhuoqi Wen<sup>c</sup>, Zhongjie Cui<sup>a</sup>, Dan Yang<sup>a</sup>, Wanlu Zhang<sup>a</sup>, Fengxian Xie<sup>a</sup>, Bobo Yang<sup>c,d,\*</sup>, Ruiqian Guo<sup>a,c,e,\*</sup>, Guichuan Xing<sup>b,\*</sup>

<sup>a</sup> Institute for Electric Light Sources, School of Information Science and Technology, Fudan University, Shanghai 200433, China

<sup>b</sup> Institute of Applied Physics and Materials Engineering, University of Macau, Avenida da Universidade, Taipa, Macau 999078, China

<sup>c</sup> Institute of Future Lighting, Academy for Engineering and Technology, Fudan University, Shanghai 200433, China

<sup>d</sup> School of Science, Shanghai Institute of Technology, Shanghai 201418, China

<sup>e</sup> Zhongshan - Fudan Joint Innovation Center, Zhongshan 528437, China

<sup>1</sup> These authors contributed equally.

\* Corresponding author: [rqguo@fudan.edu.cn](mailto:rqguo@fudan.edu.cn); [gcxing@um.edu.mo](mailto:gcxing@um.edu.mo), [boboyang@sit.edu.cn](mailto:boboyang@sit.edu.cn);

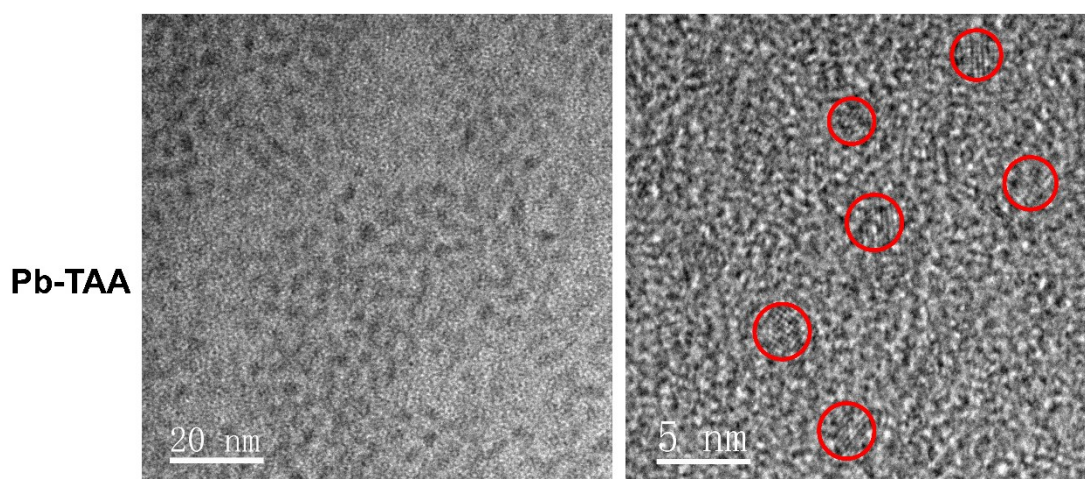

Figure S1. TEM images of Pb precursor after adding 5%TAA ligand. The marked circles are Pb-S clusters.

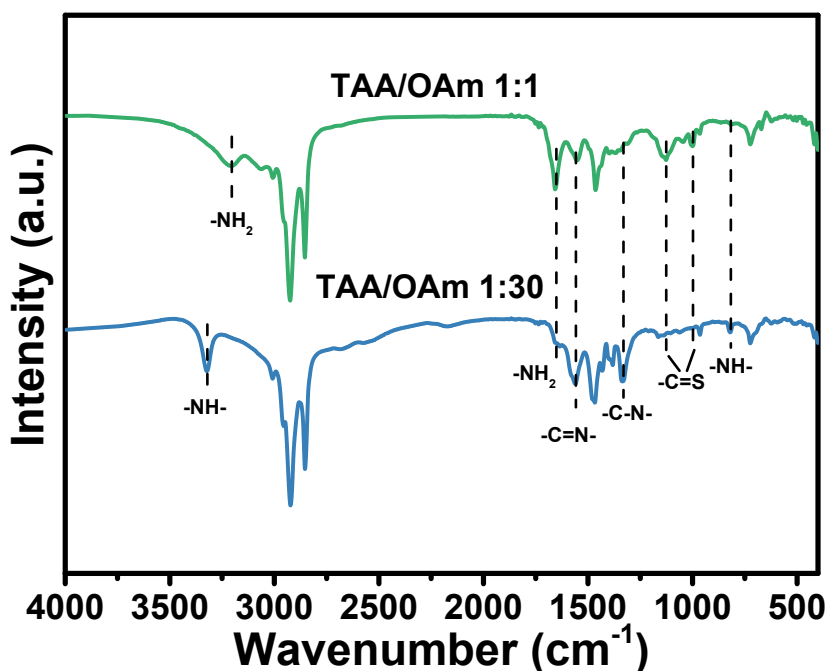

Figure S2. FTIR spectra of TAA-OAm ligand solution with different TAA/OAm molar ratio of 1:1 and 1:30. The representative peaks are marked to verify the terminal production of the reaction between TAA and OAm. The sample with 1:1 molar ratio provides insufficient OAm to finish substitution, still remaining obvious peaks of -C=S and -NH<sub>2</sub>. The sample with 1:30 molar ratio ensures excess OAm to react with TAA, which appears significant weakened -C=S and -NH<sub>2</sub> peaks and remarkably enhanced -C=N-, -C-N- and -NH- signals.

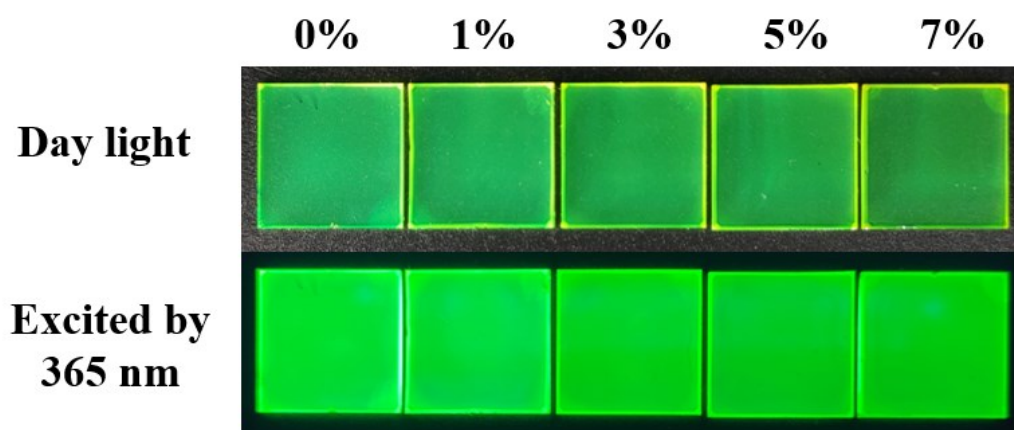

Figure S3. Photographs of initial thin films fabricated by as-prepared CsPbBr<sub>3</sub> NCs with different TAA/Pb molar ratios under day light and 365 nm UV light.

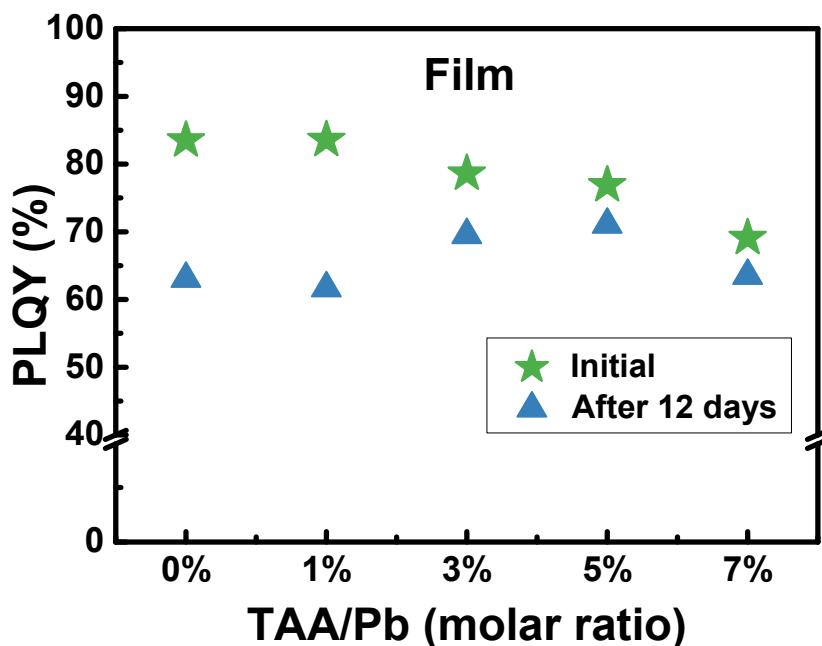

Figure S4. PLQYs and stability of thin films fabricated by as-prepared CsPbBr<sub>3</sub> NCs with different TAA/Pb molar ratios. The initial PLQYs of thin films are 83%, 83%, 78%, 76% and 69% for 0%, 1%, 3%, 5%, 7% TAA CsPbBr<sub>3</sub> NCs, respectively. After being stored in air at room temperature for 12 days, their corresponding PLQYs decrease to 63%, 61%, 69%, 71% and 63%, respectively.

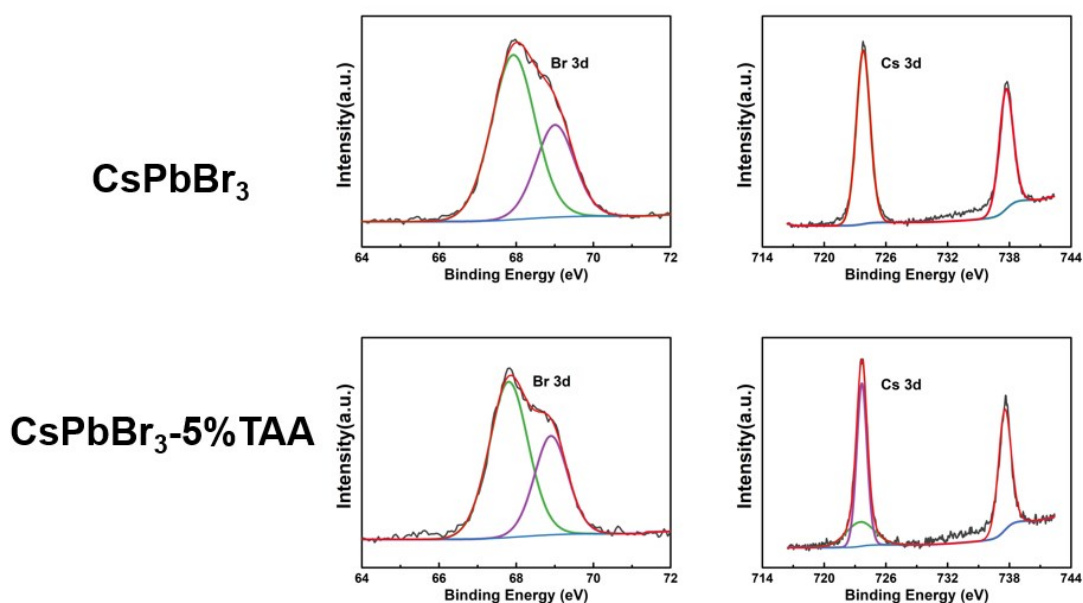

Figure S5. XPS spectra of Br 3d and Cs 3d peaks for as-controlled CsPbBr<sub>3</sub> NCs and CsPbBr<sub>3</sub>-TAA NCs.

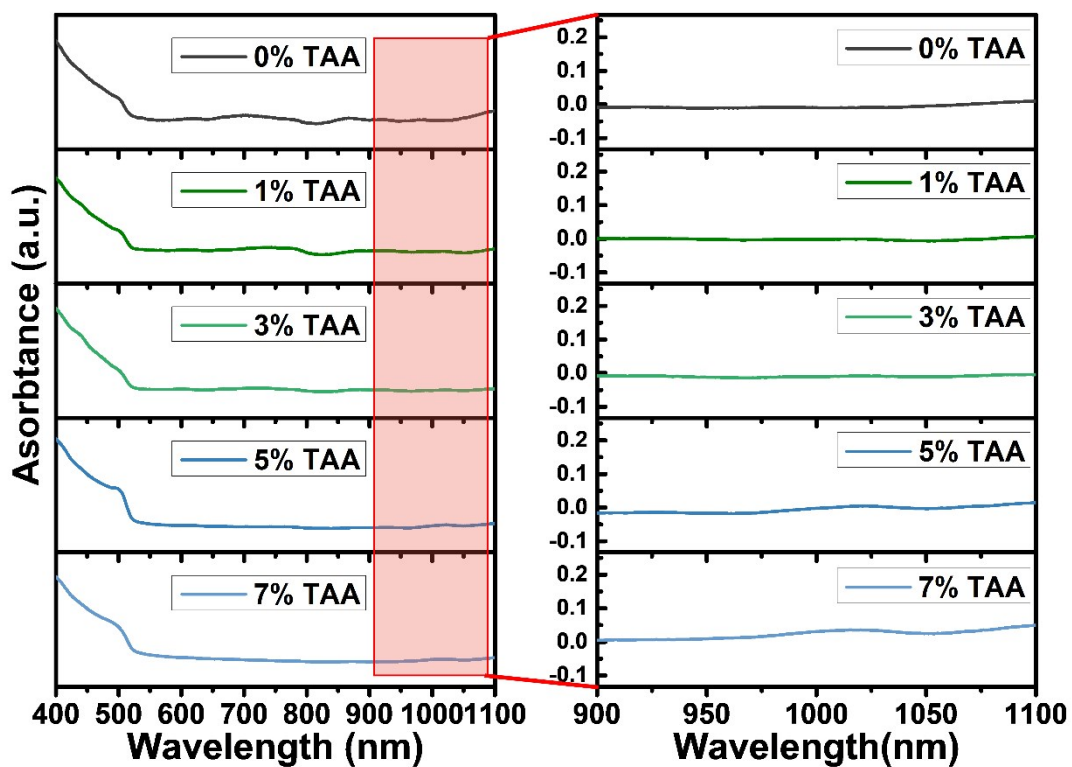

Figure S6. The absorption spectra of CsPbBr<sub>3</sub> NCs with different TAA/Pb molar ratios, and the right are their corresponding magnified absorption features in the NIR region.

Table S1 Lifetime components of CsPbBr<sub>3</sub> NCs with various TAA/Pb molar ratios.

|              | $\tau_1$ (ns) | $\tau_2$ (ns) | $B_1$ (%) | $B_1$ (%) | $\tau_{ave}$ (ns) |
|--------------|---------------|---------------|-----------|-----------|-------------------|
| <b>0%TAA</b> | 6.758         | 52.73         | 63.33     | 36.67     | 23.62             |
| <b>1%TAA</b> | 7.573         | 65.85         | 57.63     | 42.35     | 32.25             |
| <b>3%TAA</b> | 6.929         | 64.3          | 60.63     | 39.37     | 29.52             |
| <b>5%TAA</b> | 6.981         | 53.77         | 62.66     | 37.34     | 24.45             |
| <b>7%TAA</b> | 5.877         | 56.22         | 63.67     | 36.33     | 24.17             |
